# Supplementary material
Source: ML conference proceedings conference paper supplement (https://proceedings.mlr.press/v80/du18b.html)
Supplement: Supplementary file [file du18b-supp.pdf]

## A. Proofs of Section 3

*Proof of Theorem 3.1.* We first expand the loss function directly.

$$\begin{aligned}
 \ell(\mathbf{v}, \mathbf{a}) &= \mathbb{E} \left[ \frac{1}{2} (y - \mathbf{a}^\top \sigma(\mathbf{Z} \mathbf{w}))^2 \right] \\
 &= (\mathbf{a}^*)^\top \mathbb{E} \left[ \sigma(\mathbf{Z} \mathbf{w}^*) \sigma(\mathbf{Z} \mathbf{w}^*)^\top \right] \mathbf{a}^* + \mathbf{a}^\top \mathbb{E} \left[ \sigma(\mathbf{Z} \mathbf{w}) \sigma(\mathbf{Z} \mathbf{w})^\top \right] \mathbf{a} - 2 \mathbf{a}^\top \mathbb{E} \left[ \sigma(\mathbf{Z} \mathbf{w}) \sigma(\mathbf{Z} \mathbf{w}^*)^\top \right] \mathbf{a}^* \\
 &= (\mathbf{a}^*)^\top \mathbf{A}(\mathbf{w}^*) \mathbf{a}^* + \mathbf{a}^\top \mathbf{A}(\mathbf{w}) \mathbf{a} - 2 \mathbf{a}^\top \mathbf{B}(\mathbf{w}, \mathbf{w}^*) \mathbf{w}^*.
 \end{aligned}$$

where for simplicity, we denote

$$\mathbf{A}(\mathbf{w}) = \mathbb{E} \left[ \sigma(\mathbf{Z} \mathbf{w}) \sigma(\mathbf{Z} \mathbf{w})^\top \right] \quad (5)$$

$$\mathbf{B}(\mathbf{w}, \mathbf{w}^*) = \mathbb{E} \left[ \sigma(\mathbf{Z} \mathbf{w}) \sigma(\mathbf{Z} \mathbf{w}^*)^\top \right]. \quad (6)$$

For  $i \neq j$ , using the second identity of Lemma A.1, we can compute

$$\mathbf{A}(\mathbf{w})_{ij} = \mathbb{E} \left[ \sigma(\mathbf{Z}_i^\top \mathbf{w}) \right] \mathbb{E} \left[ \sigma(\mathbf{Z}_j^\top \mathbf{w}) \right] = \frac{1}{2\pi} \|\mathbf{w}\|_2^2$$

For  $i = j$ , using the second moment formula of half-Gaussian distribution we can compute

$$\mathbf{A}(\mathbf{w})_{ii} = \frac{1}{2} \|\mathbf{w}\|_2^2.$$

Therefore

$$\mathbf{A}(\mathbf{w}) = \frac{1}{2\pi} \|\mathbf{w}\|_2^2 (\mathbf{1}\mathbf{1}^\top + (\pi - 1) \mathbf{I}).$$

Now let us compute  $\mathbf{B}(\mathbf{w}, \mathbf{w}^*)$ . For  $i \neq j$ , similar to  $\mathbf{A}(\mathbf{w})_{ij}$ , using the independence property of Gaussian, we have

$$\mathbf{B}(\mathbf{w}, \mathbf{w}^*)_{ij} = \frac{1}{2\pi} \|\mathbf{w}\|_2 \|\mathbf{w}^*\|_2.$$

Next, using the fourth identity of Lemma A.1, we have

$$\mathbf{B}(\mathbf{w}, \mathbf{w}^*)_{ii} = \frac{1}{2\pi} (\cos \phi (\pi - \phi) + \sin \phi) \|\mathbf{w}\|_2 \|\mathbf{w}^*\|_2.$$

Therefore, we can also write  $\mathbf{B}(\mathbf{w}, \mathbf{w}^*)$  in a compact form

$$\mathbf{B}(\mathbf{w}, \mathbf{w}^*) = \frac{1}{2\pi} \|\mathbf{w}\|_2 \|\mathbf{w}^*\|_2 (\mathbf{1}\mathbf{1}^\top + (\cos \phi (\pi - \phi) + \sin \phi - 1) \mathbf{I}).$$

Plugging in the formulas of  $\mathbf{A}(\mathbf{w})$  and  $\mathbf{B}(\mathbf{w}, \mathbf{w}^*)$  and  $\mathbf{w} = \frac{\mathbf{v}}{\|\mathbf{v}\|_2}$ , we obtain the desired result.  $\square$

*Proof of Theorem 3.2.* We first compute the expect gradient for  $\mathbf{v}$ . From (Salimans & Kingma, 2016), we know

$$\frac{\partial \ell(\mathbf{v}, \mathbf{a})}{\partial \mathbf{v}} = \frac{1}{\|\mathbf{v}\|_2} \left( \mathbf{I} - \frac{\mathbf{v}\mathbf{v}^\top}{\|\mathbf{v}\|_2^2} \right) \frac{\partial \ell(\mathbf{w}, \mathbf{a})}{\partial \mathbf{w}}.$$

Recall the gradient formula,

$$\begin{aligned} & \frac{\partial \ell(\mathbf{Z}, \mathbf{w}, \mathbf{a})}{\partial \mathbf{w}} \\ &= \left( \sum_{i=1}^k a_i^* \sigma(\mathbf{Z}_i \mathbf{w}) - \sum_{i=1}^k a_i^* \sigma(\mathbf{Z}_i \mathbf{w}^*) \right) \left( \sum_{i=1}^k a_i \mathbf{Z}_i \mathbb{I}\{\mathbf{Z}_i^\top \mathbf{w}\} \right) \\ &= \left( \sum_{i=1}^k a_i^2 \mathbf{Z}_i \mathbf{Z}_i^\top \mathbb{I}\{\mathbf{Z}_i^\top \mathbf{w} \geq 0\} + \sum_{i \neq j} a_i a_j \mathbf{Z}_i \mathbf{Z}_j^\top \mathbb{I}\{\mathbf{Z}_i^\top \mathbf{w} \geq 0, \mathbf{Z}_j^\top \mathbf{w} \geq 0\} \right) \mathbf{w} \end{aligned} \quad (7)$$

$$- \left( \sum_{i=1}^k a_i a_i^* \mathbf{Z}_i \mathbf{Z}_i^\top \mathbb{I}\{\mathbf{Z}_i^\top \mathbf{w} \geq 0, \mathbf{Z}_i^\top \mathbf{w}^* \geq 0\} + \sum_{i \neq j} a_i a_j^* \mathbf{Z}_i \mathbf{Z}_j^* \mathbb{I}\{\mathbf{Z}_i^\top \mathbf{w} \geq 0, \mathbf{Z}_j^\top \mathbf{w}^* \geq 0\} \right) \mathbf{w}^*. \quad (8)$$

Now we calculate expectation of Equation (7) and (8) separately. For (7), by first two formulas of Lemma A.1, we have

$$\begin{aligned} & \left( \sum_{i=1}^k a_i^2 \mathbf{Z}_i \mathbf{Z}_i^\top \mathbb{I}\{\mathbf{Z}_i^\top \mathbf{w} \geq 0\} + \sum_{i \neq j} a_i a_j \mathbf{Z}_i \mathbf{Z}_j^\top \mathbb{I}\{\mathbf{Z}_i^\top \mathbf{w} \geq 0, \mathbf{Z}_j^\top \mathbf{w} \geq 0\} \right) \mathbf{w} \\ &= \sum_{i=1}^k a_i^2 \cdot \frac{\mathbf{w}}{2} + \sum_{i \neq j} a_i a_j \frac{\mathbf{w}}{2\pi}. \end{aligned}$$

For (8), we use the second and third formula in Lemma A.1 to obtain

$$\begin{aligned} & \left( \sum_{i=1}^k a_i a_i^* \mathbf{Z}_i \mathbf{Z}_i^\top \mathbb{I}\{\mathbf{Z}_i^\top \mathbf{w} \geq 0, \mathbf{Z}_i^\top \mathbf{w}^* \geq 0\} + \sum_{i \neq j} a_i a_j^* \mathbf{Z}_i \mathbf{Z}_j^* \mathbb{I}\{\mathbf{Z}_i^\top \mathbf{w} \geq 0, \mathbf{Z}_j^\top \mathbf{w}^* \geq 0\} \right) \mathbf{w}^* \\ &= \mathbf{a}^\top \mathbf{a}^* \left( \frac{1}{\pi} (\pi - \phi) \mathbf{w}^* + \frac{1}{\pi} \sin \phi \frac{\|\mathbf{w}^*\|_2}{\|\mathbf{w}\|_2} \mathbf{w} \right) + \sum_{i \neq j} a_i a_j^* \frac{1}{2\pi} \frac{\|\mathbf{w}^*\|_2}{\|\mathbf{w}\|_2} \mathbf{w}. \end{aligned}$$

In summary, aggregating them together we have

$$\begin{aligned} & \mathbb{E}_{\mathbf{Z}} \left[ \frac{\partial \ell(\mathbf{Z}, \mathbf{w}, \mathbf{a})}{\partial \mathbf{w}} \right] \\ &= \frac{1}{2\pi} \mathbf{a}^\top \mathbf{a}^* (\pi - \phi) \mathbf{w}^* + \left( \frac{\|\mathbf{a}\|_2^2}{2} + \frac{\sum_{i \neq j} a_i a_j}{2\pi} + \frac{\mathbf{a}^\top \mathbf{a}^* \sin \phi \|\mathbf{w}^*\|_2}{2\pi \|\mathbf{w}\|_2} + \frac{\sum_{i \neq j} a_j a_j^* \|\mathbf{w}^*\|_2}{2\pi \|\mathbf{w}\|_2} \right) \mathbf{w}. \end{aligned}$$

As a sanity check, this formula matches Equation (16) of (Brutzkus & Globerson, 2017) when  $\mathbf{a} = \mathbf{a}^* = \mathbf{1}$ .

Next, we calculate the expected gradient of  $\mathbf{a}$ . Recall the gradient formula of  $\mathbf{a}$

$$\begin{aligned} \frac{\partial \ell(\mathbf{Z}, \mathbf{w}, \mathbf{a})}{\partial \mathbf{a}} &= (\mathbf{a}^\top \sigma(\mathbf{Z}\mathbf{w}) - (\mathbf{a}^*)^\top \sigma(\mathbf{Z}\mathbf{w}^*)) \sigma(\mathbf{Z}\mathbf{w}) \\ &= \sigma(\mathbf{Z}\mathbf{w}) \sigma(\mathbf{Z}\mathbf{w})^\top \mathbf{a} - \sigma(\mathbf{Z}\mathbf{w}) \sigma(\mathbf{Z}\mathbf{w}^*)^\top \mathbf{a}^* \end{aligned}$$

Taking expectation we have

$$\frac{\partial \ell(\mathbf{w}, \mathbf{a})}{\partial \mathbf{a}} = \mathbf{A}(\mathbf{w}) \mathbf{a} - \mathbf{B}(\mathbf{w}, \mathbf{w}^*) \mathbf{a}^*$$

where  $\mathbf{A}(\mathbf{w})$  and  $\mathbf{B}(\mathbf{w}, \mathbf{w}^*)$  are defined in Equation (5) and (6). Plugging in the formulas for  $\mathbf{A}(\mathbf{w})$  and  $\mathbf{B}(\mathbf{w}, \mathbf{w}^*)$  derived in the proof of Theorem 3.1 we obtained the desired result.  $\square$

**Lemma A.1** (Useful Identities). *Given  $\mathbf{w}$ ,  $\mathbf{w}^*$  with angle  $\phi$  and  $\mathbf{Z}$  is a Gaussian random vector, then*

$$\begin{aligned}\mathbb{E} [\mathbf{z}\mathbf{z}^\top \mathbb{I} \{ \mathbf{z}^\top \mathbf{w} \geq 0 \}] \mathbf{w} &= \frac{1}{2} \mathbf{w} \\ \mathbb{E} [\mathbf{z} \mathbb{I} \{ \mathbf{z}^\top \mathbf{w} \geq 0 \}] &= \frac{1}{\sqrt{2\pi}} \frac{\mathbf{w}}{\|\mathbf{w}\|_2} \\ \mathbb{E} [\mathbf{z}\mathbf{z}^\top \mathbb{I} \{ \mathbf{z}^\top \mathbf{w} \geq 0, \mathbf{z}^\top \mathbf{w}_* \geq 0 \}] \mathbf{w}_* &= \frac{1}{2\pi} (\pi - \phi) \mathbf{w}_* + \frac{1}{2\pi} \sin \phi \frac{\|\mathbf{w}^*\|_2}{\|\mathbf{w}\|_2} \mathbf{w} \\ \mathbb{E} [\sigma(\mathbf{z}^\top \mathbf{w}) \sigma(\mathbf{z}^\top \mathbf{w}_*)] &= \frac{1}{2\pi} (\cos \phi (\pi - \phi) + \sin \phi) \|\mathbf{w}\|_2 \|\mathbf{w}^*\|_2\end{aligned}$$

*Proof.* Consider an orthonormal basis of  $\mathbb{R}^{d \times d}$ :  $\{\mathbf{e}_i \mathbf{e}_j^\top\}$  with  $\mathbf{e}_1 \parallel \mathbf{w}$ . Then for  $i \neq j$ , we know

$$\langle \mathbf{e}_i \mathbf{e}_j, \mathbb{E} [\mathbf{z}\mathbf{z}^\top \mathbb{I} \{ \mathbf{z}^\top \mathbf{w} \geq 0 \}] \rangle = 0$$

by the independence properties of Gaussian random vector. For  $i = j = 1$ ,

$$\langle \mathbf{e}_1 \mathbf{e}_1^\top, \mathbb{E} [\mathbf{z}\mathbf{z}^\top \mathbb{I} \{ \mathbf{z}^\top \mathbf{w} \geq 0 \}] \rangle = \mathbb{E} [(\mathbf{z}^\top \mathbf{w})^2 \mathbb{I} \{ \mathbf{z}^\top \mathbf{w} \geq 0 \}] = \frac{1}{2}$$

where the last step is by the property of half-Gaussian. For  $i = j \neq 1$ ,  $\langle \mathbf{e}_i \mathbf{e}_j^\top, \mathbb{E} [\mathbf{z}\mathbf{z}^\top \mathbb{I} \{ \mathbf{z}^\top \mathbf{w} \geq 0 \}] \rangle = 1$  by standard Gaussian second moment formula. Therefore,  $\mathbb{E} [\mathbf{z}\mathbf{z}^\top \mathbb{I} \{ \mathbf{z}^\top \mathbf{w} \geq 0 \}] \mathbf{w} = \frac{1}{2} \mathbf{w}$ .  $\mathbb{E} [\mathbf{z} \mathbb{I} \{ \mathbf{z}^\top \mathbf{w} \geq 0 \}] = \frac{1}{\sqrt{2\pi}} \mathbf{w}$  can be proved by mean formula of half-normal distribution. To prove the third identity, consider an orthonormal basis of  $\mathbb{R}^{d \times d}$ :  $\{\mathbf{e}_i \mathbf{e}_j^\top\}$  with  $\mathbf{e}_1 \parallel \mathbf{w}_*$  and  $\mathbf{w}$  lies in the plane spanned by  $\mathbf{e}_1$  and  $\mathbf{e}_2$ . Using the polar representation of 2D Gaussian random variables ( $r$  is the radius and  $\theta$  is the angle with  $dP_r = r \exp(-r^2/2)$  and  $dP_\theta = \frac{1}{2\pi}$ ):

$$\begin{aligned}\langle \mathbf{e}_1 \mathbf{e}_1^\top, \mathbb{E} [\mathbf{z}\mathbf{z}^\top \mathbb{I} \{ \mathbf{z}^\top \mathbf{w} \geq 0, \mathbf{z}^\top \mathbf{w}_* \geq 0 \}] \rangle &= \frac{1}{2\pi} \int_0^\infty r^3 \exp(-r^2/2) dr \cdot \int_{-\pi/2+\phi}^{\pi/2} \cos^2 \theta d\theta \\ &= \frac{1}{2\pi} (\pi - \phi + \sin \phi \cos \phi), \\ \langle \mathbf{e}_1 \mathbf{e}_2^\top, \mathbb{E} [\mathbf{z}\mathbf{z}^\top \mathbb{I} \{ \mathbf{z}^\top \mathbf{w} \geq 0, \mathbf{z}^\top \mathbf{w}_* \geq 0 \}] \rangle &= \frac{1}{2\pi} \int_0^\infty r^3 \exp(-r^2/2) dr \cdot \int_{-\pi/2+\phi}^{\pi/2} \sin \theta \cos \theta d\theta \\ &= \frac{1}{2\pi} (\sin^2 \phi), \\ \langle \mathbf{e}_2 \mathbf{e}_2^\top, \mathbb{E} [\mathbf{z}\mathbf{z}^\top \mathbb{I} \{ \mathbf{z}^\top \mathbf{w} \geq 0, \mathbf{z}^\top \mathbf{w}_* \geq 0 \}] \rangle &= \frac{1}{2\pi} \int_0^\infty r^3 \exp(-r^2/2) dr \cdot \int_{-\pi/2+\phi}^{\pi/2} \sin^2 \theta d\theta \\ &= \frac{1}{2\pi} (\pi - \phi - \sin \phi \cos \phi).\end{aligned}$$

Also note that  $\mathbf{e}_2 = \frac{\bar{\mathbf{w}} - \cos \phi \mathbf{e}_1}{\sin \phi}$ . Therefore

$$\begin{aligned}\mathbb{E} [\mathbf{z}\mathbf{z}^\top \mathbb{I} \{ \mathbf{z}^\top \mathbf{w} \geq 0, \mathbf{z}^\top \mathbf{w}_* \geq 0 \}] \mathbf{w}_* &= \frac{1}{2\pi} (\pi - \phi + \sin \phi \cos \phi) \mathbf{w}_* + \frac{1}{2\pi} \sin^2 \phi \cdot \frac{\bar{\mathbf{w}} - \cos \phi \mathbf{e}_1}{\sin \phi} \|\mathbf{w}^*\|_2 \\ &= \frac{1}{2\pi} (\pi - \phi) \mathbf{w}_* + \frac{1}{2\pi} \sin \phi \frac{\|\mathbf{w}^*\|_2}{\|\mathbf{w}\|_2} \mathbf{w}.\end{aligned}$$

For the fourth identity, focusing on the plane spanned by  $\mathbf{w}$  and  $\mathbf{w}_*$ , using the polar decomposition, we have

$$\begin{aligned}\mathbb{E} [\sigma(\mathbf{z}^\top \mathbf{w}) \sigma(\mathbf{z}^\top \mathbf{w}_*)] &= \frac{1}{2\pi} \int_0^\infty r^3 \exp(-r^2/2) dr \cdot \int_{-\pi/2+\phi}^{\pi/2} (\cos \theta \cos \phi + \sin \theta \sin \phi) \cos \theta d\theta \|\mathbf{w}\|_2 \|\mathbf{w}^*\|_2 \\ &= \frac{1}{2\pi} (\cos \phi (\pi - \phi + \sin \phi \cos \phi) + \sin^3 \phi) \|\mathbf{w}\|_2 \|\mathbf{w}^*\|_2.\end{aligned}$$

□

## B. Proofs of Qualitative Convergence Results

*Proof of Lemma 5.1.* When Algorithm 1 converges, since  $\mathbf{a}^\top \mathbf{a}^* \neq 0$  and  $\|\mathbf{v}\|_2 < \infty$ , using the gradient formula in Theorem 3.2, we know that either  $\pi - \phi = 0$  or  $\left(\mathbf{I} - \frac{\mathbf{v}\mathbf{v}^\top}{\|\mathbf{v}\|_2^2}\right) \mathbf{w}^* = \mathbf{0}$ . For the second case, since  $\mathbf{I} - \frac{\mathbf{v}\mathbf{v}^\top}{\|\mathbf{v}\|_2^2}$  is a projection matrix on the complement space of  $\mathbf{v}$ ,  $\left(\mathbf{I} - \frac{\mathbf{v}\mathbf{v}^\top}{\|\mathbf{v}\|_2^2}\right) \mathbf{w}^* = \mathbf{0}$  is equivalent to  $\theta(\mathbf{v}, \mathbf{w}^*) = 0$ . Once the angle between  $\mathbf{v}$  and  $\mathbf{w}^*$  is fixed, using the gradient formula for  $\mathbf{a}$  we have the desired formulas for saddle points.  $\square$

*Proof of Lemma 5.2.* By the gradient formula of  $\mathbf{w}$ , if  $\mathbf{a}^\top \mathbf{a}^* > 0$ , the gradient is of the form  $c \left(\mathbf{I} - \frac{\mathbf{v}\mathbf{v}^\top}{\|\mathbf{v}\|_2^2}\right) \mathbf{w}^*$  where  $c > 0$ . Thus because  $\mathbf{I} - \frac{\mathbf{v}\mathbf{v}^\top}{\|\mathbf{v}\|_2^2}$  is the projection matrix onto the complement space of  $\mathbf{v}$ , the gradient update always makes the angle smaller.  $\square$

## C. Proofs of Quantitative Convergence Results

### C.1. Useful Technical Lemmas

We first prove the lemma about the convergence of  $\phi^t$ .

*Proof of Lemma 5.5.* We consider the dynamics of  $\sin^2 \phi^t$ .

$$\begin{aligned}
 & \sin^2 \phi^{t+1} \\
 &= 1 - \frac{\left((\mathbf{v}^{t+1})^\top \mathbf{w}^*\right)^2}{\|\mathbf{v}^{t+1}\|_2^2 \|\mathbf{w}^*\|_2^2} \\
 &= 1 - \frac{\left((\mathbf{v}^t - \eta \frac{\partial \ell}{\partial \mathbf{v}^t})^\top \mathbf{w}^*\right)^2}{\left(\|\mathbf{v}^t\|_2^2 + \eta^2 \left(\frac{\partial \ell}{\partial \mathbf{v}^t}\right)^2\right) \|\mathbf{w}^*\|_2^2} \\
 &= 1 - \frac{\left((\mathbf{v}^t)^\top \mathbf{v} + \eta \frac{(\mathbf{a}^t)^\top \mathbf{a}^* (\pi - \phi^t)}{2\pi \|\mathbf{v}\|_2} \cdot \sin^2 \phi^t \|\mathbf{w}\|_2\right)^2}{\|\mathbf{v}^t\|_2^2 \|\mathbf{w}^*\|_2^2 + \eta^2 \left(\frac{(\mathbf{a}^t)^\top \mathbf{a}^* (\pi - \phi^t)}{2\pi}\right)^2 \frac{\sin^2 \phi^t \|\mathbf{w}^*\|_2^4}{\|\mathbf{v}^t\|_2^2}} \\
 &\leq 1 - \frac{\|\mathbf{v}^t\|_2^2 \|\mathbf{w}^*\|_2^2 \cos^2 \phi^t + 2\eta \|\mathbf{w}^*\|_2^3 \cdot \frac{(\mathbf{a}^t)^\top \mathbf{a}^* (\pi - \phi)}{2\pi} \cdot \sin^2 \phi^t \cos \phi^t}{\|\mathbf{v}^t\|_2^2 \|\mathbf{w}^*\|_2^2 + \eta^2 \left(\frac{(\mathbf{a}^t)^\top \mathbf{a}^* (\pi - \phi^t)}{2\pi}\right)^2 \frac{\sin^2 \phi^t \|\mathbf{w}^*\|_2^4}{\|\mathbf{v}^t\|_2^2}} \\
 &= \frac{\sin^2 \phi^t - 2\eta \frac{\|\mathbf{w}^*\|_2}{\|\mathbf{v}^t\|_2^2} \cdot \frac{(\mathbf{a}^t)^\top \mathbf{a}^* (\pi - \phi)}{2\pi} \cdot \sin^2 \phi^t \cos \phi^t + \eta^2 \left(\frac{(\mathbf{a}^t)^\top \mathbf{a}^* (\pi - \phi)}{2\pi}\right)^2 \sin^2 \phi^t \left(\frac{\|\mathbf{w}^*\|_2}{\|\mathbf{v}^t\|_2}\right)^2}{1 + \eta^2 \left(\frac{(\mathbf{a}^t)^\top \mathbf{a}^* (\pi - \phi)}{2\pi}\right)^2 \sin^2 \phi^t \left(\frac{\|\mathbf{w}^*\|_2}{\|\mathbf{v}^t\|_2}\right)^2} \\
 &\leq \sin^2 \phi^t - 2\eta \frac{\|\mathbf{w}^*\|_2}{\|\mathbf{v}^t\|_2^2} \cdot \frac{(\mathbf{a}^t)^\top \mathbf{a}^* (\pi - \phi)}{2\pi} \cdot \sin^2 \phi^t \cos \phi^t + \eta^2 \left(\frac{(\mathbf{a}^t)^\top \mathbf{a}^* (\pi - \phi)}{2\pi}\right)^2 \sin^2 \phi^t \left(\frac{\|\mathbf{w}^*\|_2}{\|\mathbf{v}^t\|_2}\right)^2
 \end{aligned}$$

where in the first inequality we dropped term proportional to  $O(\eta^4)$  because it is negative, in the last equality, we divided numerator and denominator by  $\|\mathbf{v}^t\|_2^2 \|\mathbf{w}^*\|_2^2$  and the last inequality we dropped the denominator because it is bigger than 1.

Therefore, recall  $\lambda^t = \frac{\|\mathbf{w}^*\|_2 \left(\frac{(\mathbf{a}^t)^\top \mathbf{a}^* (\pi - \phi^t)}{2\pi \|\mathbf{v}^t\|_2^2}\right)}$  and we have

$$\sin^2 \phi^{t+1} \leq \left(1 - 2\eta \cos \phi^t \lambda^t + \eta^2 (\lambda^t)^2\right) \sin^2 \phi^t. \quad (9)$$

To this end, we need to make sure  $\eta \leq \frac{\cos \phi^t}{\lambda^t}$ . Note that since  $\|\mathbf{v}^t\|_2^2$  is monotonically increasing, it is lower bounded by 1. Next notice  $\phi^t \leq \pi/2$ . Finally, from Lemma C.2, we know  $(\mathbf{a}^t)^\top \mathbf{a}^* \leq \left(\|\mathbf{a}^*\|_2^2 + (\mathbf{1}^\top \mathbf{a}^*)^2\right) \|\mathbf{w}\|_2^2$ . Combining these, we

have an upper bound

$$\lambda^t \leq \frac{\left(\|\mathbf{a}^*\|_2^2 + (\mathbf{1}^\top \mathbf{a}^*)^2\right) \|\mathbf{w}^*\|_2^2}{4}.$$

Plugging this back to Equation (9) and use our assumption on  $\eta$ , we have

$$\sin^2 \phi^{t+1} \leq (1 - \eta \cos \phi^t \lambda^t) \sin^2 \phi^t.$$

□

**Lemma C.1.**  $(\mathbf{a}^{t+1})^\top \mathbf{a}^* \geq \min \left\{ (\mathbf{a}^t)^\top \mathbf{a}^* + \eta \left( \frac{g(\phi^t) - 1}{\pi - 1} \|\mathbf{a}^*\|_2^2 - (\mathbf{a}^t)^\top \mathbf{a}^* \right), \frac{g(\phi^t) - 1}{\pi - 1} \|\mathbf{a}^*\|_2^2 \right\}$

*Proof.* Recall the dynamics of  $(\mathbf{a}^t)^\top \mathbf{a}^*$ .

$$\begin{aligned} (\mathbf{a}^{t+1})^\top \mathbf{a}^* &= \left(1 - \frac{\eta(\pi - 1)}{2\pi}\right) (\mathbf{a}^t)^\top \mathbf{a}^* + \frac{\eta(g(\phi^t) - 1)}{2\pi} \|\mathbf{a}^*\|_2^2 + \frac{\eta}{2\pi} \left( (\mathbf{1}^\top \mathbf{a}^*)^2 - (\mathbf{1}^\top \mathbf{a}^*) (\mathbf{1}^\top \mathbf{a}^t) \right) \\ &\geq \left(1 - \frac{\eta(\pi - 1)}{2\pi}\right) (\mathbf{a}^t)^\top \mathbf{a}^* + \frac{\eta(g(\phi^t) - 1)}{2\pi} \|\mathbf{a}^*\|_2^2 \end{aligned}$$

where the inequality is due to Lemma 5.4. If  $(\mathbf{a}^t)^\top \mathbf{a}^* \geq \frac{g(\phi^t) - 1}{\pi - 1} \|\mathbf{a}^*\|_2^2$ ,

$$\begin{aligned} (\mathbf{a}^{t+1})^\top \mathbf{a}^* &\geq \left(1 - \frac{\eta(\pi - 1)}{2\pi}\right) \frac{g(\phi^t) - 1}{\pi - 1} \|\mathbf{a}^*\|_2^2 + \frac{\eta(g(\phi^t) - 1)}{\pi - 1} \|\mathbf{a}^*\|_2^2 \\ &= \frac{g(\phi^t) - 1}{\pi - 1} \|\mathbf{a}^*\|_2^2. \end{aligned}$$

If  $(\mathbf{a}^t)^\top \mathbf{a}^* \leq \frac{g(\phi^t) - 1}{\pi - 1} \|\mathbf{a}^*\|_2^2$ , simple algebra shows  $(\mathbf{a}^{t+1})^\top \mathbf{a}^*$  increases by at least

$$\eta \left( \frac{g(\phi^t) - 1}{\pi - 1} \|\mathbf{a}^*\|_2^2 - (\mathbf{a}^t)^\top \mathbf{a}^* \right).$$

□

A simple corollary is  $\mathbf{a}^\top \mathbf{a}^*$  is uniformly lower bounded.

**Corollary C.1.** For all  $t = 1, 2, \dots$ ,  $(\mathbf{a}^t)^\top \mathbf{a}^* \geq \min \left\{ (\mathbf{a}^0)^\top \mathbf{a}^*, \frac{g(\phi^0) - 1}{\pi - 1} \|\mathbf{a}^*\|_2^2 \right\}$ .

This lemma also gives an upper bound of number of iterations to make  $\mathbf{a}^\top \mathbf{a}^* = \Theta(\|\mathbf{a}^*\|_2^2)$ .

**Corollary C.2.** If  $g(\phi) - 1 = \Omega(1)$ , then after  $\frac{1}{\eta}$  iterations,  $\mathbf{a}^\top \mathbf{a}^* = \Theta(\|\mathbf{a}^*\|_2^2)$ .

*Proof.* Note if  $g(\phi) - 1 = \Omega(1)$  and  $\mathbf{a}^\top \mathbf{a}^* \leq \frac{1}{2} \cdot \frac{g(\phi) - 1}{\pi - 1} \|\mathbf{a}^*\|_2^2$ , each iteration  $\mathbf{a}^\top \mathbf{a}^*$  increases by  $\eta \frac{g(\phi) - 1}{\pi - 1} \|\mathbf{a}^*\|_2^2$ .

□

We also need an upper bound of  $(\mathbf{a}^t)^\top \mathbf{a}^*$ .

**Lemma C.2.** For  $t = 0, 1, \dots$ ,  $(\mathbf{a}^t)^\top \mathbf{a}^* \leq \left( \|\mathbf{a}^*\|_2^2 + (\mathbf{1}^\top \mathbf{a}^*)^2 \right) \|\mathbf{w}^*\|_2^2$ .

*Proof.* Without loss of generality, assume  $\|\mathbf{w}^*\|_2 = 1$ . Again, recall the dynamics of  $(\mathbf{a}^t)^\top \mathbf{a}^*$ .

$$\begin{aligned} (\mathbf{a}^{t+1})^\top \mathbf{a}^* &= \left(1 - \frac{\eta(\pi - 1)}{2\pi}\right) (\mathbf{a}^t)^\top \mathbf{a}^* + \frac{\eta(g(\phi^t) - 1)}{2\pi} \|\mathbf{a}^*\|_2^2 + \frac{\eta}{2\pi} \left( (\mathbf{1}^\top \mathbf{a}^*)^2 - (\mathbf{1}^\top \mathbf{a}^*) (\mathbf{1}^\top \mathbf{a}^t) \right) \\ &\leq \left(1 - \frac{\eta(\pi - 1)}{2\pi}\right) (\mathbf{a}^t)^\top \mathbf{a}^* + \frac{\eta(\pi - 1)}{2\pi} \|\mathbf{a}^*\|_2^2 + \frac{\eta(\pi - 1)}{2\pi} (\mathbf{1}^\top \mathbf{a}^*)^2. \end{aligned}$$

Now we prove by induction, suppose the conclusion holds at iteration  $t$ ,  $(\mathbf{a}^t)^\top \mathbf{a}^* \leq \|\mathbf{a}^*\|_2^2 + (\mathbf{1}^\top \mathbf{a}^*)^2$ . Plugging in we have the desired result. □

## C.2. Convergence of Phase I

In this section we prove the convergence of Phase I.

*Proof of Convergence of Phase I.* Lemma C.3 implies after  $O\left(\frac{1}{\cos \phi^0 \beta^0}\right)$  iterations,  $\cos \phi^t = \Omega(1)$ , which implies  $\frac{g(\phi^t)-1}{\pi-1} = \Omega(1)$ . Using Corollary C.2, we know after  $O\left(\frac{1}{\eta}\right)$  iterations we have  $(\mathbf{a}^t)^\top \mathbf{a}^* \|\mathbf{w}^*\| = \Omega\left(\|\mathbf{w}^*\|_2^2 \|\mathbf{a}^*\|_2^2\right)$ .  $\square$

The main ingredient of the proof of phase I is the follow lemma where we use a joint induction argument to show the convergence of  $\phi^t$  and a uniform upper bound of  $\|\mathbf{v}^t\|_2$ .

**Lemma C.3.** *Let  $\beta^0 = \min\left\{(\mathbf{a}^0)^\top \mathbf{a}^*, (g(\phi^0) - 1) \|\mathbf{a}^*\|_2^2\right\} \|\mathbf{w}^*\|_2$ . If the step size satisfies  $\eta \leq \min\left\{\frac{\beta^* \cos \phi^0}{8(\|\mathbf{a}^*\|_2^2 + (\mathbf{1}^\top \mathbf{a}^*)^2) \|\mathbf{w}^*\|_2^2}, \frac{\cos \phi^0}{(\|\mathbf{a}^*\|_2^2 + (\mathbf{1}^\top \mathbf{a}^*)^2) \|\mathbf{w}^*\|_2^2}, \frac{2\pi}{k+\pi-1}\right\}$ , we have for  $t = 0, 1, \dots$*

$$\sin^2 \phi^t \leq \left(1 - \eta \cdot \frac{\cos \phi^0 \beta^0}{8}\right)^t \text{ and } \|\mathbf{v}^t\|_2 \leq 2.$$

*Proof.* We prove by induction. The initialization ensure when  $t = 0$ , the conclusion is correct. Now we consider the dynamics of  $\|\mathbf{v}^t\|_2^2$ . Note because the gradient of  $\mathbf{v}$  is orthogonal to  $\mathbf{v}$  (Salimans & Kingma, 2016), we have a simple dynamic of  $\|\mathbf{v}^t\|_2^2$ .

$$\begin{aligned} \|\mathbf{v}^t\|_2^2 &= \|\mathbf{v}^{t-1}\|_2^2 + \eta^2 \left\| \frac{\partial \ell(\mathbf{v}, \mathbf{a})}{\partial \mathbf{v}} \right\|_2^2 \\ &= \|\mathbf{v}^{t-1}\|_2^2 + \eta^2 \left( \frac{(\mathbf{a}^t)^\top \mathbf{a}^* (\pi - \phi^{t-1})}{2\pi} \right)^2 \frac{\sin^2 \phi^t \|\mathbf{w}^*\|_2^2}{\|\mathbf{v}^t\|_2^2} \\ &\leq \|\mathbf{v}^{t-1}\|_2^2 + \eta^2 \left( \|\mathbf{a}^*\|_2^2 + (\mathbf{1}^\top \mathbf{a}^*)^2 \right) \|\mathbf{w}^*\|_2^2 \sin^2 \phi^{t-1} \\ &= 1 + \eta^2 \left( \|\mathbf{a}^*\|_2^2 + (\mathbf{1}^\top \mathbf{a}^*)^2 \right) \|\mathbf{w}^*\|_2^2 \sum_{i=1}^{t-1} \sin^2 \phi^i \\ &\leq 1 + \eta^2 \left( \|\mathbf{a}^*\|_2^2 + (\mathbf{1}^\top \mathbf{a}^*)^2 \right) \|\mathbf{w}^*\|_2^2 \frac{8}{\eta \cos \phi^0 \beta^0} \\ &\leq 2 \end{aligned}$$

where the first inequality is by Lemma C.2 and the second inequality we use our induction hypothesis. Recall  $\lambda^t = \frac{\|\mathbf{w}^*\|_2 \left( (\mathbf{a}^t)^\top \mathbf{a}^* \right) (\pi - \phi^t)}{2\pi \|\mathbf{v}^t\|_2^2}$ . The uniform upper bound of  $\|\mathbf{v}\|_2$  and the fact that  $\phi^t \leq \pi/2$  imply a lower bound  $\lambda^t \geq \frac{\beta^0}{8}$ . Plugging in Lemma 5.5, we have

$$\sin^2 \phi^{t+1} \leq \left(1 - \eta \frac{\cos \phi^0 \beta^0}{8}\right) \sin^2 \phi^t \leq \left(1 - \eta \frac{\cos \phi^0 \beta^0}{8}\right)^{t+1}.$$

We finish our joint induction proof.  $\square$

## C.3. Analysis of Phase II

In this section we prove the convergence of phase II and necessary auxiliary lemmas.

*Proof of Convergence of Phase II.* At the beginning of Phase II,  $(\mathbf{a}^{T_1})^\top \mathbf{a}^* \|\mathbf{w}^*\| = \Omega\left(\|\mathbf{w}^*\|_2^2 \|\mathbf{a}^*\|_2^2\right)$  and  $g(\phi^{T_1}) - 1 = \Omega(1)$ . Therefore, Lemma C.1 implies for all  $t = T_1, T_1 + 1, \dots$ ,  $(\mathbf{a}^t)^\top \mathbf{a}^* \|\mathbf{w}^*\| = \Omega\left(\|\mathbf{w}^*\|_2^2 \|\mathbf{a}^*\|_2^2\right)$ . Combining with the fact that  $\|\mathbf{v}\|_2 \leq 2$  (c.f. Lemma C.3), we obtain a lower bound  $\lambda_t \geq \Omega\left(\|\mathbf{w}^*\|_2^2 \|\mathbf{a}^*\|_2^2\right)$ . We also know that  $\cos \phi^{T_1} = \Omega(1)$

and  $\cos \phi^t$  is monotonically increasing (c.f. Lemma 5.2), so for all  $t = T_1, T_1 + 1, \dots$ ,  $\cos \phi^t = \Omega(1)$ . Plugging in these two lower bounds into Theorem 5.5, we have

$$\sin^2 \phi^{t+1} \leq \left(1 - \eta C \|\mathbf{w}^*\|_2^2 \|\mathbf{a}^*\|_2^2\right) \sin^2 \phi^t.$$

for some absolute constant  $C$ . Thus, after  $O\left(\frac{1}{\eta \|\mathbf{w}^*\|_2^2 \|\mathbf{a}^*\|_2^2} \log\left(\frac{1}{\epsilon}\right)\right)$  iterations, we have  $\sin^2 \phi^t \leq \min\left\{\epsilon^{10}, \left(\epsilon \frac{\|\mathbf{a}^*\|_2}{|\mathbf{1}^\top \mathbf{a}^*|}\right)^{10}\right\}$ , which implies  $\pi - g(\phi^t) \leq \min\left\{\epsilon, \epsilon \frac{\|\mathbf{a}^*\|_2}{|\mathbf{1}^\top \mathbf{a}^*|}\right\}$ . Now using Lemma C.4, Lemma C.5 and Lemma C.6, we have after  $\tilde{O}\left(\frac{1}{\eta k} \log\left(\frac{1}{\epsilon}\right)\right)$  iterations  $\ell(\mathbf{v}, \mathbf{a}) \leq C_1 \epsilon \|\mathbf{a}^*\|_2^2 \|\mathbf{w}^*\|_2^2$  for some absolute constant  $C_1$ . Rescaling  $\epsilon$  properly we obtain the desired result.  $\square$

### C.3.1. TECHNICAL LEMMAS FOR ANALYZING PHASE II

In this section we provide some technical lemmas for analyzing Phase II. Because of the positive homogeneity property, without loss of generality, we assume  $\|\mathbf{w}^*\|_2 = 1$ .

**Lemma C.4.** *If  $\pi - g(\phi^0) \leq \epsilon \frac{\|\mathbf{a}^*\|_2}{|\mathbf{1}^\top \mathbf{a}^*|}$ , after  $T = O\left(\frac{1}{\eta k} \log\left(\frac{|\mathbf{1}^\top \mathbf{a}^* - \mathbf{1}^\top \mathbf{a}^0|}{\epsilon \|\mathbf{a}^*\|_2}\right)\right)$  iterations,  $|\mathbf{1}^\top \mathbf{a}^* - \mathbf{1}^\top \mathbf{a}^T| \leq 2\epsilon \|\mathbf{a}^*\|_2$ .*

*Proof.* Recall the dynamics of  $\mathbf{1}^\top \mathbf{a}^t$ .

$$\begin{aligned} \mathbf{1}^\top \mathbf{a}^{t+1} &= \left(1 - \frac{\eta(k + \pi - 1)}{2\pi}\right) \mathbf{1}^\top \mathbf{a}^t + \frac{\eta(k + g(\phi^t) - 1)}{2\pi} \mathbf{1}^\top \mathbf{a}^* \\ &= \left(1 - \frac{\eta(k + \pi - 1)}{2\pi}\right) \mathbf{1}^\top \mathbf{a}^t + \frac{\eta(k + g(\phi^t) - 1)}{2\pi} \mathbf{1}^\top \mathbf{a}^*. \end{aligned}$$

Assume  $\mathbf{1}^\top \mathbf{a}^* > 0$  (the other case is similar). By Lemma 5.4 we know  $\mathbf{1}^\top \mathbf{a}^t < \mathbf{1}^\top \mathbf{a}^*$  for all  $t$ . Consider

$$\mathbf{1}^\top \mathbf{a}^* - \mathbf{1}^\top \mathbf{a}^{t+1} = \left(1 - \frac{\eta(k + \pi - 1)}{2\pi}\right) (\mathbf{1}^\top \mathbf{a}^* - \mathbf{1}^\top \mathbf{a}^t) + \frac{\eta(\pi - g(\phi^t))}{2\pi} \mathbf{1}^\top \mathbf{a}^*.$$

Therefore we have

$$\mathbf{1}^\top \mathbf{a}^* - \mathbf{1}^\top \mathbf{a}^{t+1} - \frac{(\pi - g(\phi^t)) \mathbf{1}^\top \mathbf{a}^*}{k + \pi - 1} = \left(1 - \frac{\eta(k + \pi - 1)}{2\pi}\right) \left(\mathbf{1}^\top \mathbf{a}^* - \mathbf{1}^\top \mathbf{a}^t - \frac{(\pi - g(\phi^t)) \mathbf{1}^\top \mathbf{a}^*}{k + \pi - 1}\right).$$

After  $T = O\left(\frac{1}{\eta k} \log\left(\frac{|\mathbf{1}^\top \mathbf{a}^* - \mathbf{1}^\top \mathbf{a}^0|}{\epsilon \|\mathbf{a}^*\|_2}\right)\right)$  iterations, we have  $\mathbf{1}^\top \mathbf{a}^* - \mathbf{1}^\top \mathbf{a}^t - \frac{(\pi - g(\phi^t)) \mathbf{1}^\top \mathbf{a}^*}{k + \pi - 1} \leq \epsilon \|\mathbf{a}^*\|_2$ , which implies  $\mathbf{1}^\top \mathbf{a}^* - \mathbf{1}^\top \mathbf{a}^t \leq 2\epsilon \|\mathbf{a}^*\|_2$ .  $\square$

**Lemma C.5.** *If  $\pi - g(\phi^0) \leq \epsilon \frac{\|\mathbf{a}^*\|_2}{|\mathbf{1}^\top \mathbf{a}^*|}$  and  $|\mathbf{1}^\top \mathbf{a}^* - \mathbf{1}^\top \mathbf{a}^0| \leq \frac{\epsilon}{k} \|\mathbf{a}^*\|_2$ , then after  $T = O\left(\frac{1}{\eta} \log\left(\frac{\|\mathbf{a}^* - \mathbf{a}^0\|_2}{\epsilon \|\mathbf{a}^*\|_2}\right)\right)$  iterations,  $\|\mathbf{a}^* - \mathbf{a}^0\|_2 \leq C\epsilon \|\mathbf{a}^*\|_2$  for some absolute constant  $C$ .*

*Proof.* We first consider the inner product

$$\begin{aligned} &\left\langle \frac{\partial \ell(\mathbf{v}^t, \mathbf{a}^t)}{\mathbf{a}^t}, \mathbf{a}^t - \mathbf{a}^* \right\rangle \\ &= \frac{\pi - 1}{2\pi} \|\mathbf{a}^t - \mathbf{a}^*\|_2^2 - \frac{g(\phi^t) - \pi}{2\pi} (\mathbf{a}^*)^\top (\mathbf{a}^t - \mathbf{a}^*) + (\mathbf{a}^t - \mathbf{a}^*) \mathbf{1} \mathbf{1}^\top (\mathbf{a}^t - \mathbf{a}^*) \\ &\geq \frac{\pi - 1}{2\pi} \|\mathbf{a}^t - \mathbf{a}^*\|_2^2 - \frac{g(\phi^t) - \pi}{2\pi} \|\mathbf{a}^*\|_2 \|\mathbf{a}^t - \mathbf{a}^*\|_2. \end{aligned}$$

Next we consider the squared norm of gradient

$$\begin{aligned} \left\| \frac{\partial \ell(\mathbf{v}, \mathbf{a})}{\partial \mathbf{a}} \right\|_2^2 &= \frac{1}{4\pi^2} \left\| (\pi - 1)(\mathbf{a}^t - \mathbf{a}^*) + (\pi - g(\phi^t))\mathbf{a}^* + \mathbf{1}\mathbf{1}^\top (\mathbf{a}^t - \mathbf{a}^*) \right\|_2^2 \\ &\leq \frac{3}{4\pi^2} \left( (\pi - 1)^2 \|\mathbf{a}^t - \mathbf{a}^*\|_2^2 + (\pi - g(\phi^t))^2 \|\mathbf{a}^*\|_2^2 + k^2 (\mathbf{1}^\top \mathbf{a}^t - \mathbf{1}^\top \mathbf{a}^*)^2 \right). \end{aligned}$$

Suppose  $\|\mathbf{a}^t - \mathbf{a}^*\|_2 \leq \epsilon \|\mathbf{a}^*\|_2$ , then

$$\begin{aligned} \left\langle \frac{\partial \ell(\mathbf{v}, \mathbf{a}^t)}{\partial \mathbf{a}^t}, \mathbf{a}^t - \mathbf{a}^* \right\rangle &\geq \frac{\pi - 1}{2\pi} \|\mathbf{a}^t - \mathbf{a}^*\|_2^2 - \frac{\epsilon^2}{2\pi} \|\mathbf{a}^*\|_2^2 \\ \left\| \frac{\partial \ell(\mathbf{v}, \mathbf{a})}{\partial \mathbf{a}} \right\|_2^2 &\leq 3\epsilon^2 \|\mathbf{a}^*\|_2^2. \end{aligned}$$

Therefore we have

$$\begin{aligned} \|\mathbf{a}^{t+1} - \mathbf{a}^*\|_2^2 &\leq \left( 1 - \frac{\eta(\pi - 1)}{2\pi} \right) \|\mathbf{a}^t - \mathbf{a}^*\|_2^2 + 4\eta\epsilon^2 \|\mathbf{a}\|_2^2 \\ \Rightarrow \|\mathbf{a}^{t+1} - \mathbf{a}^*\|_2^2 - \frac{8(\pi - 1)\epsilon^2 \|\mathbf{a}^*\|_2^2}{\pi - 1} &\leq \left( 1 - \frac{\eta(\pi - 1)}{2\pi} \right) \left( \|\mathbf{a}^t - \mathbf{a}^*\|_2^2 - \frac{8(\pi - 1)\epsilon^2 \|\mathbf{a}^*\|_2^2}{\pi - 1} \right). \end{aligned}$$

Thus after  $O\left(\frac{1}{\eta} \left(\frac{1}{\epsilon}\right)\right)$  iterations, we must have  $\|\mathbf{a}^{t+1} - \mathbf{a}^*\|_2^2 \leq C\epsilon \|\mathbf{a}^*\|_2$  for some large absolute constant  $C$ . Rescaling  $\epsilon$ , we obtain the desired result.  $\square$

**Lemma C.6.** *If  $\pi - g(\phi) \leq \epsilon$  and  $\|\mathbf{a} - \mathbf{a}^*\|_2 \|\mathbf{w}^*\|_2 \leq \epsilon \|\mathbf{a}^*\|_2 \|\mathbf{w}^*\|_2$ , then the population loss satisfies  $\ell(\mathbf{v}, \mathbf{a}) \leq C\epsilon \|\mathbf{a}^*\|_2^2 \|\mathbf{w}^*\|_2^2$  for some constant  $C > 0$ .*

*Proof.* The result follows by plugging in the assumptions in Theorem 3.1.  $\square$

## D. Proofs of Initialization Scheme

*Proof of Theorem 4.2.* The proof of the first part of Theorem 4.2 just uses the symmetry of unit sphere and ball and the second part is a direct application of Lemma 2.5 of (Hardt & Price, 2014). Lastly, since  $\mathbf{a}^0 \sim \mathcal{B}\left(\mathbf{0}, \frac{|\mathbf{1}^\top \mathbf{a}^*|}{\sqrt{k}}\right)$ , we have  $\mathbf{1}^\top \mathbf{a}^0 \leq \|\mathbf{a}^0\|_1 \leq \sqrt{k} \|\mathbf{a}^0\|_2 \leq |\mathbf{1}^\top \mathbf{a}^*| \|\mathbf{w}^*\|_2$  where the second inequality is due to Hölder's inequality.  $\square$

## E. Proofs of Converging to Spurious Local Minimum

*Proof of Theorem 4.3.* The main idea is similar to Theorem 4.1 but here we show  $\mathbf{w} \rightarrow -\mathbf{w}^*$  (without loss of generality, we assume  $\|\mathbf{w}^*\|_2 = 1$ ). Different from Theorem 4.1, here we need to prove the invariance  $\mathbf{a}^\top \mathbf{a}^* < 0$ , which implies our desired result. We prove by induction, suppose  $(\mathbf{a}^t)^\top \mathbf{a}^* > 0$ ,  $|\mathbf{1}^\top \mathbf{a}^t| \leq |\mathbf{1}^\top \mathbf{a}^*|$ ,  $g(\phi^0) \leq \frac{-2(\mathbf{1}^\top \mathbf{a})^2}{\|\mathbf{a}^*\|_2^2} + 1$  and  $\eta < \frac{k+\pi-1}{2\pi}$ . Note  $|\mathbf{1}^\top \mathbf{a}^t| \leq |\mathbf{1}^\top \mathbf{a}^*|$  are satisfied by Lemma 5.4 and  $g(\phi^0) \leq \frac{-2(\mathbf{1}^\top \mathbf{a})^2}{\|\mathbf{a}^*\|_2^2} + 1$  by our initialization condition and induction hypothesis that implies  $\phi^t$  is increasing. Recall the dynamics of  $(\mathbf{a}^t)^\top \mathbf{a}^*$ .

$$\begin{aligned} (\mathbf{a}^{t+1})^\top \mathbf{a}^* &= \left( 1 - \frac{\eta(\pi - 1)}{2\pi} \right) (\mathbf{a}^t)^\top \mathbf{a}^* + \frac{\eta(g(\phi^t) - 1)}{2\pi} \|\mathbf{a}^*\|_2^2 + \frac{\eta}{2\pi} \left( (\mathbf{1}^\top \mathbf{a}^*)^2 - (\mathbf{1}^\top \mathbf{a}^t) (\mathbf{1}^\top \mathbf{a}^*) \right) \\ &\leq \frac{\eta \left( (g(\phi^t) - 1) \|\mathbf{a}^*\|_2 + 2(\mathbf{1}^\top \mathbf{a}^*)^2 \right)}{2\pi} < 0 \end{aligned}$$

where the first inequality we used our induction hypothesis on inner product between  $\mathbf{a}^t$  and  $\mathbf{a}^*$  and  $|\mathbf{1}^\top \mathbf{a}^t| \leq |\mathbf{1}^\top \mathbf{a}^*|$  and the second inequality is by induction hypothesis on  $\phi^t$ . Thus when gradient descent algorithm converges, according Lemma 5.1,  $\theta(\mathbf{v}, \mathbf{w}^*) = \pi$ ,  $\mathbf{a} = (\mathbf{1}\mathbf{1}^\top + (\pi - 1)\mathbf{I})^{-1} (\mathbf{1}\mathbf{1}^\top - \mathbf{I}) \|\mathbf{w}^*\|_2 \mathbf{a}^*$ . Plugging these into Theorem 3.1, with some routine algebra, we show  $\ell(\mathbf{v}, \mathbf{a}) = \Omega\left(\|\mathbf{w}^*\|_2^2 \|\mathbf{a}^*\|_2^2\right)$ .  $\square$
